# Supplementary material for: Characterization of mycobacteriophage Adephagia cytotoxic proteins
Source: PubMed Central journal article supplement (PMC11373665; doi:10.1093/g3journal/jkae166), 2024-07-20
Supplement: jkae166_supplementary_data.pdf [file jkae166_supplementary_data.pdf]

## Supplementary Materials

### Supplementary Tables

Table S1. Plasmids reported in this study.

### Supplemental Figure legends

#### **Figure S1. Adephagia protein expression and solubility assay.**

Mycobacteriophage Adephagia proteins were cloned as N-terminal fusions to mRuby2 and overexpressed in *E. coli*. Cultures were lysed to create a whole cell lysate (W) and centrifuged to isolate a soluble fraction (S) in the supernatant. The solubility of each protein after autoinduction at 17 °C (gray) or 37 °C (orange) was assessed with plate reader assays quantifying the mRuby2 signal in the soluble fraction versus the whole cell lysate, **a**. The expression and solubility of each protein after expression at 17 °C was assessed by SDS-PAGE analysis, **b**. A marker (M) indicates size standards and the W and S samples of each culture are indicated above each well; the expected size of the fusion protein is shown below each well set.

#### **Figure S2. AlphaFold2 models of Adephagia proteins resulting in cytotoxic and small colony phenotypes in *M. smegmatis* mc<sup>2</sup>155.**

**a**. AlphaFold2-predicted tertiary structures for Adephagia-encoded proteins that are cytotoxic when systematically overexpressed on a Tet-on inducible vector, colored rainbow from N- (blue) to C-terminus (red), and **b**. predicted Adephagia protein models conferring a small colony phenotype to ATc-induced colonies. The size of each model is scaled relative to each structure.

#### **Figure S3. Raw data for cytotoxicity biological triplicates.**

Biological triplicates of the assay shown in Figure 2a, demonstrating log-reductions in colony growth on uninduced and induced

plates as indicated at the bottom of the figure. The protein being expressed (or the empty vector control) is indicated above each set of plates. Next to each biological replicate are cytotoxicity scores of '++', '+++', '++++', or '+++++', indicating 2-5 log reduction in viability, respectively.

**Figure S4. Small colony phenotype analysis.** *M. smegmatis* mc<sup>2</sup>155 transformants carrying expression vectors encoding Adephagia genes that demonstrate small colony phenotypes were diluted and plated onto solid media with and without 100 ng/ml ATc inducer as indicated. Adephagia proteins are labeled above the corresponding set of plates, along with an empty vector control. Violin plots quantifying the total surface area of each colony-forming unit (cfu) in millimeters-squared on the uninduced (grey) and induced (red) solid medium plates are shown next to each plate set. Significance as determined by an unpaired t-test is denoted with asterisks as follows:  $p \leq 0.01$  (\*\*),  $\leq 0.001$  (\*\*\*),  $\leq 0.0001$  (\*\*\*\*), ns = not significant.

**Figure S5. Adephagia TA-system superinfection defense screen.** Mycobacteriophages from 61 different clusters/subclusters, with phage names indicated on the left and cluster/subcluster designation in parentheses, were serially diluted and spotted onto bacterial lawns to assess for superinfection defense. The bacterial strains tested included *M. smegmatis* mc<sup>2</sup>155 as a control and lysogens mc<sup>2</sup>155(wild-type Adephagia), mc<sup>2</sup>155(Adephagia $\Delta$ 91) and mc<sup>2</sup>155(Adephagia $\Delta$ 90 $\Delta$ 91).

**Figure S6. Temperature dependence of TA system. a.** The generation of derivatives of Adephagia $\Delta$ 90 which plaque on a non-complementing strain is described. Five independent lysates of Adephagia $\Delta$ 90 (top line) were plated on the complementing strain for single plaques (middle line); two plaques from each initial lysate were propagated as lysates on the complementing strain. The 10 lysates were then plated on a 10X concentrated non-

complementing strain for single plaques and two isolated plaques per lysate were picked (bottom line). The 90-91 regions of these plaque picks were amplified by PCR and sequenced with Sanger sequencing; the character of the resulting gp9 is displayed below each plaque pick and color coded (red for wild type gene 91 sequence, blue for a sequence with missense mutations to gene 91). These plaques were propagated as lysates on a complementing strain and DNA was extracted and subjected to complete sequencing via NextSeq; the mutations uncovered are indicated beneath the Sanger results and include SNPs and indels in the ESAS region of derivatives with wild type gene 91 sequences. The mutations to gene 91 and the ESAS region (bottom) are summarized in gp91 and ESAS sequences at the bottom of this panel. **b.** Ten-fold serial dilutions of *M. smegmatis* cultures carrying plasmids as shown on the left were plated on solid media either with or without ATc inducer and incubated for three days at 37° C or for nine days at 25° C. **c.** Cells from a 10 ml sample of cultured *M. smegmatis* mc<sup>2</sup>155 were pelleted by centrifugation and the supernatant was removed and transferred to a sterile tube. Sufficient volume of the conditioned medium supernatant was added back to the tube and the pellet was resuspended in a total volume of 1 ml. The conditioned medium supernatant was also used to dilute the cell culture by a factor of ten by mixing 900 µl of supernatant with 100 µl of culture. These samples, as well as the neat culture, were infected with 10 µl of the 10<sup>-5</sup> dilution of an AdepHagiaΔ90 lysate and then mixed with top agar and spread onto 7H10 agar plates to form phage-infected bacterial lawns with different cell densities (10X, 1X, and 0.1X, as indicated above the plates). The plates were incubated overnight at 42° C and 37° C or for five days at 25° C.

Table S1. Plasmids reported in this study

| Plasmid <sup>1</sup> | Gene <sup>2</sup>                   | Abx <sup>R,3</sup> | Replication <sup>4</sup> | Promoter           | Vector <sup>5</sup> |
|----------------------|-------------------------------------|--------------------|--------------------------|--------------------|---------------------|
| pKF8                 | Vector                              | Hygromycin B       | oriE/oriM                | tet-ON (inducible) | pCCK11              |
| pKF114               | <i>mCherry</i> (expression control) | Hygromycin B       | oriE/oriM                | tet-ON (inducible) | pKF8                |
| pKF115               | <i>Fruitloop_52</i> (toxic control) | Hygromycin B       | oriE/oriM                | tet-ON (inducible) | pKF8                |
| pML95                | <i>Adephagia_1</i>                  | Hygromycin B       | oriE/oriM                | tet-ON (inducible) | pKF8                |
| pML96                | <i>Adephagia_2</i>                  | Hygromycin B       | oriE/oriM                | tet-ON (inducible) | pKF8                |
| pML97                | <i>Adephagia_3</i>                  | Hygromycin B       | oriE/oriM                | tet-ON (inducible) | pKF8                |
| pML98                | <i>Adephagia_4</i>                  | Hygromycin B       | oriE/oriM                | tet-ON (inducible) | pKF8                |
| pML99                | <i>Adephagia_33</i>                 | Hygromycin B       | oriE/oriM                | tet-ON (inducible) | pKF8                |
| pKF165               | <i>Adephagia_34</i>                 | Hygromycin B       | oriE/oriM                | tet-ON (inducible) | pKF8                |
| pKF166               | <i>Adephagia_35</i>                 | Hygromycin B       | oriE/oriM                | tet-ON (inducible) | pKF8                |
| pKF167               | <i>Adephagia_36</i>                 | Hygromycin B       | oriE/oriM                | tet-ON (inducible) | pKF8                |
| pKF168               | <i>Adephagia_37</i>                 | Hygromycin B       | oriE/oriM                | tet-ON (inducible) | pKF8                |
| pKF169               | <i>Adephagia_38</i>                 | Hygromycin B       | oriE/oriM                | tet-ON (inducible) | pKF8                |
| pKF170               | <i>Adephagia_39</i>                 | Hygromycin B       | oriE/oriM                | tet-ON (inducible) | pKF8                |
| pML100               | <i>Adephagia_40</i>                 | Hygromycin B       | oriE/oriM                | tet-ON (inducible) | pKF8                |
| pKF214               | <i>Adephagia_42</i>                 | Hygromycin B       | oriE/oriM                | tet-ON (inducible) | pKF8                |
| pKF171               | <i>Adephagia_43</i>                 | Hygromycin B       | oriE/oriM                | tet-ON (inducible) | pKF8                |
| pKF172               | <i>Adephagia_44</i>                 | Hygromycin B       | oriE/oriM                | tet-ON (inducible) | pKF8                |
| pKF173               | <i>Adephagia_45</i>                 | Hygromycin B       | oriE/oriM                | tet-ON (inducible) | pKF8                |
| pKF174               | <i>Adephagia_46</i>                 | Hygromycin B       | oriE/oriM                | tet-ON (inducible) | pKF8                |
| pML101               | <i>Adephagia_47</i>                 | Hygromycin B       | oriE/oriM                | tet-ON (inducible) | pKF8                |
| pKF175               | <i>Adephagia_48</i>                 | Hygromycin B       | oriE/oriM                | tet-ON (inducible) | pKF8                |
| pKF176               | <i>Adephagia_49</i>                 | Hygromycin B       | oriE/oriM                | tet-ON (inducible) | pKF8                |
| pKF177               | <i>Adephagia_50</i>                 | Hygromycin B       | oriE/oriM                | tet-ON (inducible) | pKF8                |
| pKF178               | <i>Adephagia_51</i>                 | Hygromycin B       | oriE/oriM                | tet-ON (inducible) | pKF8                |
| pDJ6                 | <i>Adephagia_52</i>                 | Hygromycin B       | oriE/oriM                | tet-ON (inducible) | pKF8                |
| pDJ7                 | <i>Adephagia_53</i>                 | Hygromycin B       | oriE/oriM                | tet-ON (inducible) | pKF8                |
| pKF179               | <i>Adephagia_54</i>                 | Hygromycin B       | oriE/oriM                | tet-ON (inducible) | pKF8                |
| pKF180               | <i>Adephagia_55</i>                 | Hygromycin B       | oriE/oriM                | tet-ON (inducible) | pKF8                |
| pKF181               | <i>Adephagia_56</i>                 | Hygromycin B       | oriE/oriM                | tet-ON (inducible) | pKF8                |
| pKF182               | <i>Adephagia_57</i>                 | Hygromycin B       | oriE/oriM                | tet-ON (inducible) | pKF8                |
| pKF183               | <i>Adephagia_58</i>                 | Hygromycin B       | oriE/oriM                | tet-ON (inducible) | pKF8                |
| pKF268               | <i>Adephagia_59</i>                 | Hygromycin B       | oriE/oriM                | tet-ON (inducible) | pKF8                |
| pDJ8                 | <i>Adephagia_60</i>                 | Hygromycin B       | oriE/oriM                | tet-ON (inducible) | pKF8                |
| pKF184               | <i>Adephagia_61</i>                 | Hygromycin B       | oriE/oriM                | tet-ON (inducible) | pKF8                |
| pKF185               | <i>Adephagia_62</i>                 | Hygromycin B       | oriE/oriM                | tet-ON (inducible) | pKF8                |
| pKF186               | <i>Adephagia_63</i>                 | Hygromycin B       | oriE/oriM                | tet-ON (inducible) | pKF8                |
| pKF187               | <i>Adephagia_64</i>                 | Hygromycin B       | oriE/oriM                | tet-ON (inducible) | pKF8                |
| pKF188               | <i>Adephagia_65</i>                 | Hygromycin B       | oriE/oriM                | tet-ON (inducible) | pKF8                |
| pKF189               | <i>Adephagia_66</i>                 | Hygromycin B       | oriE/oriM                | tet-ON (inducible) | pKF8                |
| pDJ9                 | <i>Adephagia_67</i>                 | Hygromycin B       | oriE/oriM                | tet-ON (inducible) | pKF8                |
| pKF266               | <i>Adephagia_68</i>                 | Hygromycin B       | oriE/oriM                | tet-ON (inducible) | pKF8                |
| pKF267               | <i>Adephagia_69</i>                 | Hygromycin B       | oriE/oriM                | tet-ON (inducible) | pKF8                |
| pKF190               | <i>Adephagia_70</i>                 | Hygromycin B       | oriE/oriM                | tet-ON (inducible) | pKF8                |
| pKF191               | <i>Adephagia_71</i>                 | Hygromycin B       | oriE/oriM                | tet-ON (inducible) | pKF8                |
| pKF192               | <i>Adephagia_72</i>                 | Hygromycin B       | oriE/oriM                | tet-ON (inducible) | pKF8                |
| pKF193               | <i>Adephagia_73</i>                 | Hygromycin B       | oriE/oriM                | tet-ON (inducible) | pKF8                |
| pKF194               | <i>Adephagia_74</i>                 | Hygromycin B       | oriE/oriM                | tet-ON (inducible) | pKF8                |
| pKF195               | <i>Adephagia_75</i>                 | Hygromycin B       | oriE/oriM                | tet-ON (inducible) | pKF8                |
| pDJ10                | <i>Adephagia_76</i>                 | Hygromycin B       | oriE/oriM                | tet-ON (inducible) | pKF8                |
| pKF196               | <i>Adephagia_77</i>                 | Hygromycin B       | oriE/oriM                | tet-ON (inducible) | pKF8                |
| pDJ11                | <i>Adephagia_78</i>                 | Hygromycin B       | oriE/oriM                | tet-ON (inducible) | pKF8                |
| pKF197               | <i>Adephagia_79</i>                 | Hygromycin B       | oriE/oriM                | tet-ON (inducible) | pKF8                |
| pKF198               | <i>Adephagia_80</i>                 | Hygromycin B       | oriE/oriM                | tet-ON (inducible) | pKF8                |
| pKF199               | <i>Adephagia_81</i>                 | Hygromycin B       | oriE/oriM                | tet-ON (inducible) | pKF8                |
| pKF200               | <i>Adephagia_82</i>                 | Hygromycin B       | oriE/oriM                | tet-ON (inducible) | pKF8                |
| pKF201               | <i>Adephagia_83</i>                 | Hygromycin B       | oriE/oriM                | tet-ON (inducible) | pKF8                |
| pDJ12                | <i>Adephagia_84</i>                 | Hygromycin B       | oriE/oriM                | tet-ON (inducible) | pKF8                |
| pKF203               | <i>Adephagia_85</i>                 | Hygromycin B       | oriE/oriM                | tet-ON (inducible) | pKF8                |
| pKF204               | <i>Adephagia_86</i>                 | Hygromycin B       | oriE/oriM                | tet-ON (inducible) | pKF8                |

|        |                                 |              |               |                       |        |
|--------|---------------------------------|--------------|---------------|-----------------------|--------|
| pKF205 | <i>Adephagia_87</i>             | Hygromycin B | oriE/oriM     | tet-ON (inducible)    | pKF8   |
| pKF206 | <i>Adephagia_88</i>             | Hygromycin B | oriE/oriM     | tet-ON (inducible)    | pKF8   |
| pKF207 | <i>Adephagia_89</i>             | Hygromycin B | oriE/oriM     | tet-ON (inducible)    | pKF8   |
| pKF208 | <i>Adephagia_90</i>             | Hygromycin B | oriE/oriM     | tet-ON (inducible)    | pKF8   |
| pKF209 | <i>Adephagia_91</i>             | Hygromycin B | oriE/oriM     | tet-ON (inducible)    | pKF8   |
| pKF210 | <i>Adephagia_92</i>             | Hygromycin B | oriE/oriM     | tet-ON (inducible)    | pKF8   |
| pDJ13  | <i>Adephagia_93</i>             | Hygromycin B | oriE/oriM     | tet-ON (inducible)    | pKF8   |
| pKF212 | <i>Adephagia_94</i>             | Hygromycin B | oriE/oriM     | tet-ON (inducible)    | pKF8   |
| pKF213 | <i>Adephagia_95</i>             | Hygromycin B | oriE/oriM     | tet-ON (inducible)    | pKF8   |
| pKF7   | Vector                          | Streptomycin | oriE/attP-int | tet-ON (inducible)    | pCCK41 |
| pDJ14  | <i>Adephagia_91</i>             | Streptomycin | oriE/attP-int | tet-ON (inducible)    | pKF7   |
| pDJ15  | <i>Adephagia_91 G28C mutant</i> | Streptomycin | oriE/attP-int | tet-ON (inducible)    | pKF7   |
| pDJ16  | <i>Adephagia_91 H31A mutant</i> | Streptomycin | oriE/attP-int | tet-ON (inducible)    | pKF7   |
| pDJ17  | <i>Adephagia_90 T31V mutant</i> | Hygromycin B | oriE/oriM     | tet-ON (inducible)    | pKF8   |
| pDJ18  | <i>Adephagia_90</i>             | Kanamycin    | oriE/attP-int | HSP-60 (constitutive) | pLO74  |
| pKF116 | <i>Adephagia_34</i>             | Kanamycin    | oriE          | T7 (inducible)        | pET28a |
| pKF117 | <i>Adephagia_35</i>             | Kanamycin    | oriE          | T7 (inducible)        | pET28a |
| pKF118 | <i>Adephagia_36</i>             | Kanamycin    | oriE          | T7 (inducible)        | pET28a |
| pKF119 | <i>Adephagia_37</i>             | Kanamycin    | oriE          | T7 (inducible)        | pET28a |
| pKF120 | <i>Adephagia_38</i>             | Kanamycin    | oriE          | T7 (inducible)        | pET28a |
| pKF121 | <i>Adephagia_39</i>             | Kanamycin    | oriE          | T7 (inducible)        | pET28a |
| pKF122 | <i>Adephagia_43</i>             | Kanamycin    | oriE          | T7 (inducible)        | pET28a |
| pKF123 | <i>Adephagia_44</i>             | Kanamycin    | oriE          | T7 (inducible)        | pET28a |
| pKF124 | <i>Adephagia_45</i>             | Kanamycin    | oriE          | T7 (inducible)        | pET28a |
| pKF125 | <i>Adephagia_46</i>             | Kanamycin    | oriE          | T7 (inducible)        | pET28a |
| pKF126 | <i>Adephagia_48</i>             | Kanamycin    | oriE          | T7 (inducible)        | pET28a |
| pKF127 | <i>Adephagia_49</i>             | Kanamycin    | oriE          | T7 (inducible)        | pET28a |
| pKF128 | <i>Adephagia_50</i>             | Kanamycin    | oriE          | T7 (inducible)        | pET28a |
| pKF129 | <i>Adephagia_51</i>             | Kanamycin    | oriE          | T7 (inducible)        | pET28a |
| pKF130 | <i>Adephagia_54</i>             | Kanamycin    | oriE          | T7 (inducible)        | pET28a |
| pKF131 | <i>Adephagia_55</i>             | Kanamycin    | oriE          | T7 (inducible)        | pET28a |
| pKF132 | <i>Adephagia_56</i>             | Kanamycin    | oriE          | T7 (inducible)        | pET28a |
| pKF133 | <i>Adephagia_57</i>             | Kanamycin    | oriE          | T7 (inducible)        | pET28a |
| pKF134 | <i>Adephagia_58</i>             | Kanamycin    | oriE          | T7 (inducible)        | pET28a |
| pKF135 | <i>Adephagia_61</i>             | Kanamycin    | oriE          | T7 (inducible)        | pET28a |
| pKF136 | <i>Adephagia_62</i>             | Kanamycin    | oriE          | T7 (inducible)        | pET28a |
| pKF137 | <i>Adephagia_63</i>             | Kanamycin    | oriE          | T7 (inducible)        | pET28a |
| pKF138 | <i>Adephagia_64</i>             | Kanamycin    | oriE          | T7 (inducible)        | pET28a |
| pKF139 | <i>Adephagia_65</i>             | Kanamycin    | oriE          | T7 (inducible)        | pET28a |
| pKF140 | <i>Adephagia_66</i>             | Kanamycin    | oriE          | T7 (inducible)        | pET28a |
| pKF141 | <i>Adephagia_70</i>             | Kanamycin    | oriE          | T7 (inducible)        | pET28a |
| pKF142 | <i>Adephagia_71</i>             | Kanamycin    | oriE          | T7 (inducible)        | pET28a |
| pKF143 | <i>Adephagia_72</i>             | Kanamycin    | oriE          | T7 (inducible)        | pET28a |
| pKF144 | <i>Adephagia_73</i>             | Kanamycin    | oriE          | T7 (inducible)        | pET28a |
| pKF145 | <i>Adephagia_74</i>             | Kanamycin    | oriE          | T7 (inducible)        | pET28a |
| pKF146 | <i>Adephagia_75</i>             | Kanamycin    | oriE          | T7 (inducible)        | pET28a |
| pKF147 | <i>Adephagia_77</i>             | Kanamycin    | oriE          | T7 (inducible)        | pET28a |
| pKF148 | <i>Adephagia_79</i>             | Kanamycin    | oriE          | T7 (inducible)        | pET28a |
| pKF149 | <i>Adephagia_80</i>             | Kanamycin    | oriE          | T7 (inducible)        | pET28a |
| pKF150 | <i>Adephagia_81</i>             | Kanamycin    | oriE          | T7 (inducible)        | pET28a |
| pKF151 | <i>Adephagia_82</i>             | Kanamycin    | oriE          | T7 (inducible)        | pET28a |
| pKF152 | <i>Adephagia_83</i>             | Kanamycin    | oriE          | T7 (inducible)        | pET28a |
| pKF153 | <i>Adephagia_84</i>             | Kanamycin    | oriE          | T7 (inducible)        | pET28a |
| pKF154 | <i>Adephagia_85</i>             | Kanamycin    | oriE          | T7 (inducible)        | pET28a |
| pKF155 | <i>Adephagia_86</i>             | Kanamycin    | oriE          | T7 (inducible)        | pET28a |
| pKF156 | <i>Adephagia_87</i>             | Kanamycin    | oriE          | T7 (inducible)        | pET28a |
| pKF157 | <i>Adephagia_88</i>             | Kanamycin    | oriE          | T7 (inducible)        | pET28a |
| pKF158 | <i>Adephagia_89</i>             | Kanamycin    | oriE          | T7 (inducible)        | pET28a |
| pKF159 | <i>Adephagia_90</i>             | Kanamycin    | oriE          | T7 (inducible)        | pET28a |
| pKF160 | <i>Adephagia_91</i>             | Kanamycin    | oriE          | T7 (inducible)        | pET28a |
| pKF161 | <i>Adephagia_92</i>             | Kanamycin    | oriE          | T7 (inducible)        | pET28a |
| pKF162 | <i>Adephagia_93</i>             | Kanamycin    | oriE          | T7 (inducible)        | pET28a |

|        |                     |           |      |                |        |
|--------|---------------------|-----------|------|----------------|--------|
| pKF163 | <i>Adephagia_94</i> | Kanamycin | oriE | T7 (inducible) | pET28a |
| pKF164 | <i>Adephagia_95</i> | Kanamycin | oriE | T7 (inducible) | pET28a |

---

<sup>1</sup>Plasmid name

<sup>2</sup>Gene inserted into vector

<sup>3</sup>Antibiotic resistance cassette in vector

<sup>4</sup>Replication system, oriE, oriM or attP-Int derived from phage L5

<sup>5</sup>Plasmid vector

\*Sequences for the *Adephagia\_90* protospacer were produced by the Mycobacterial CRISPRi Primer Design program, and the two annealed oligo sequences used to assemble pDJ5 are as follows: 5'-GGGAGCAGTGGACGCAAGCCGTAG-3' and 5'-AAACCTACGGGCTTGCGTCCACTGC-3'.

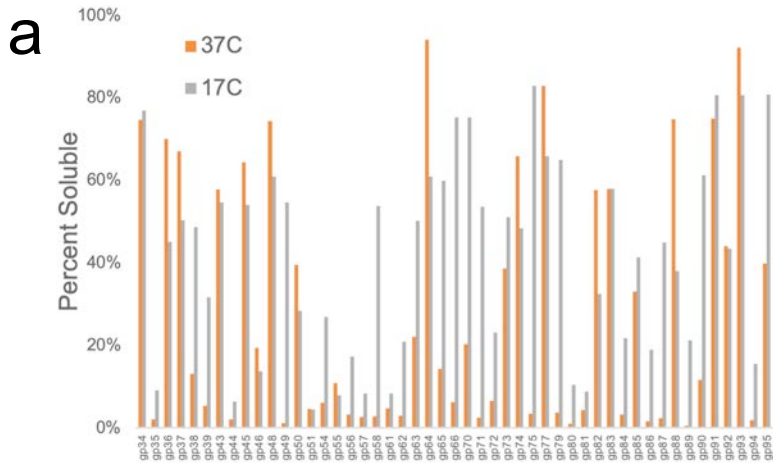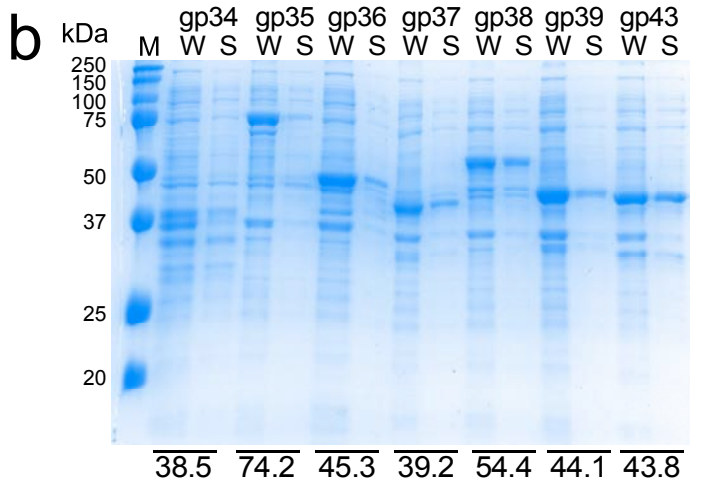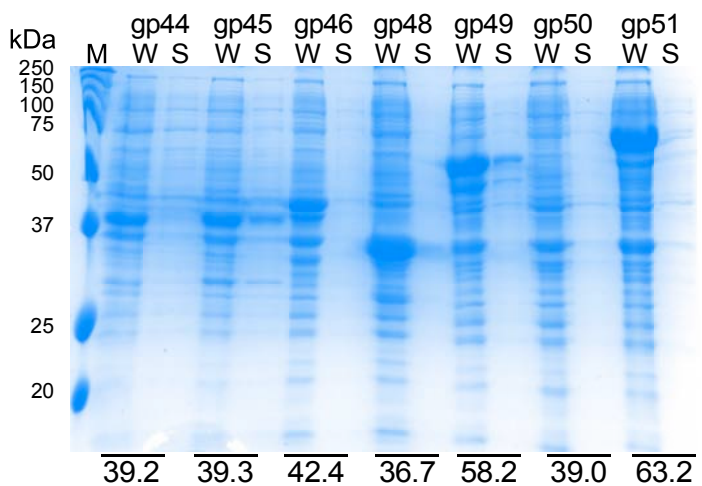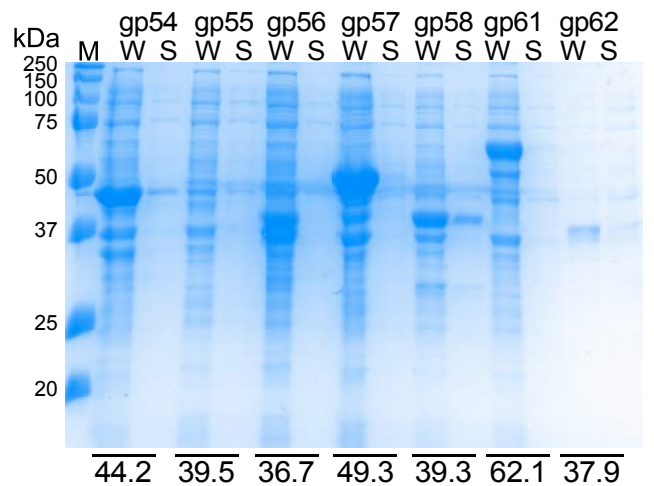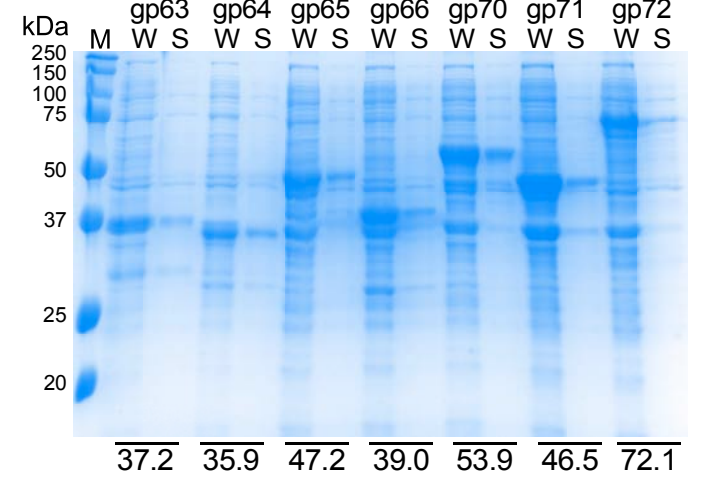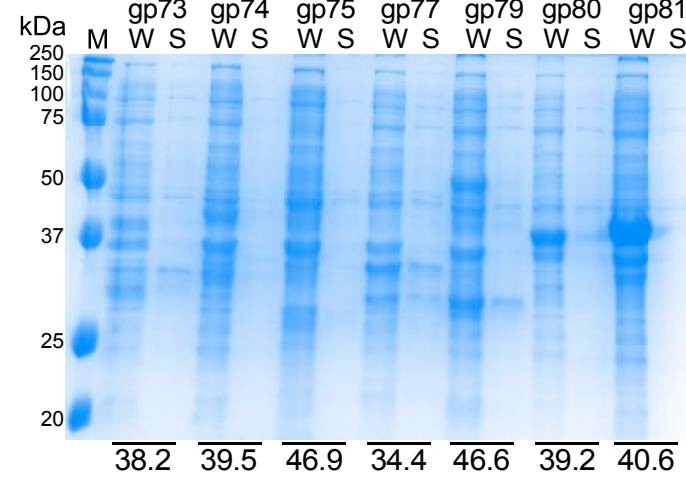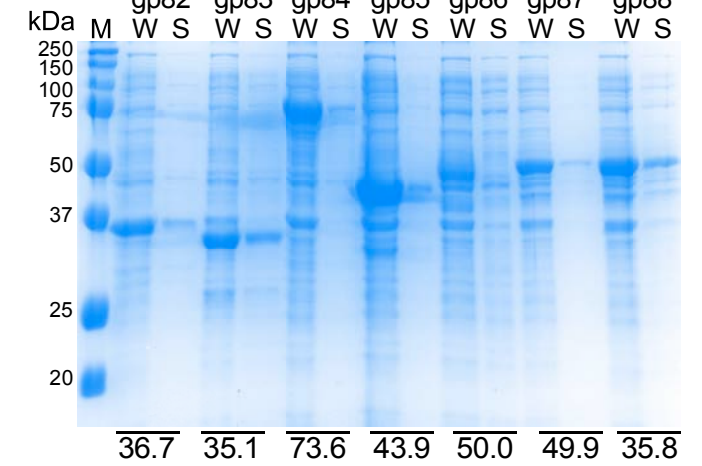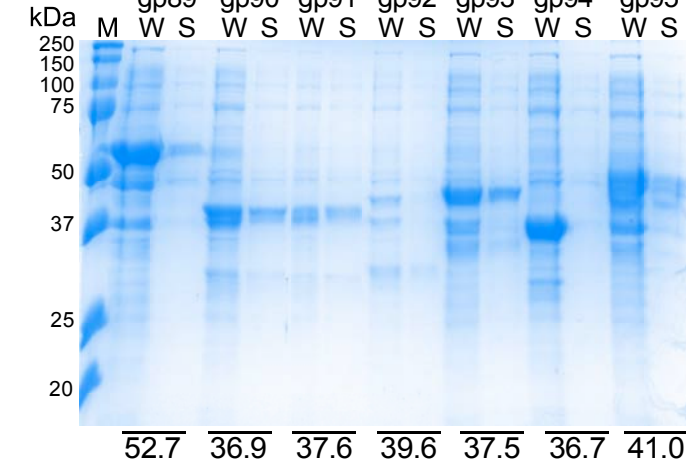

Figure S1

**a**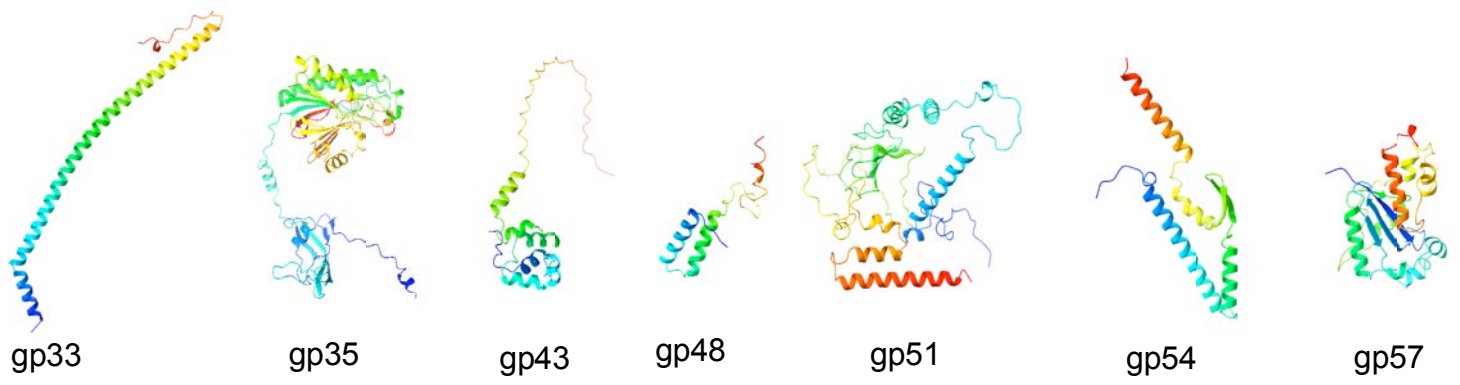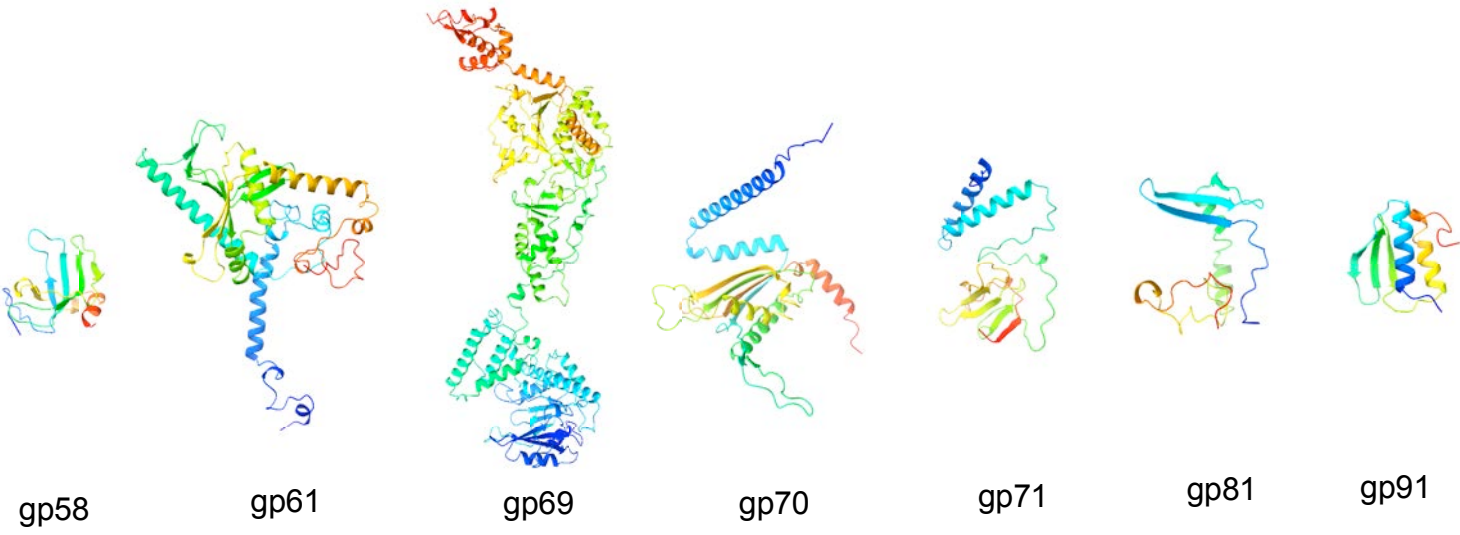**b**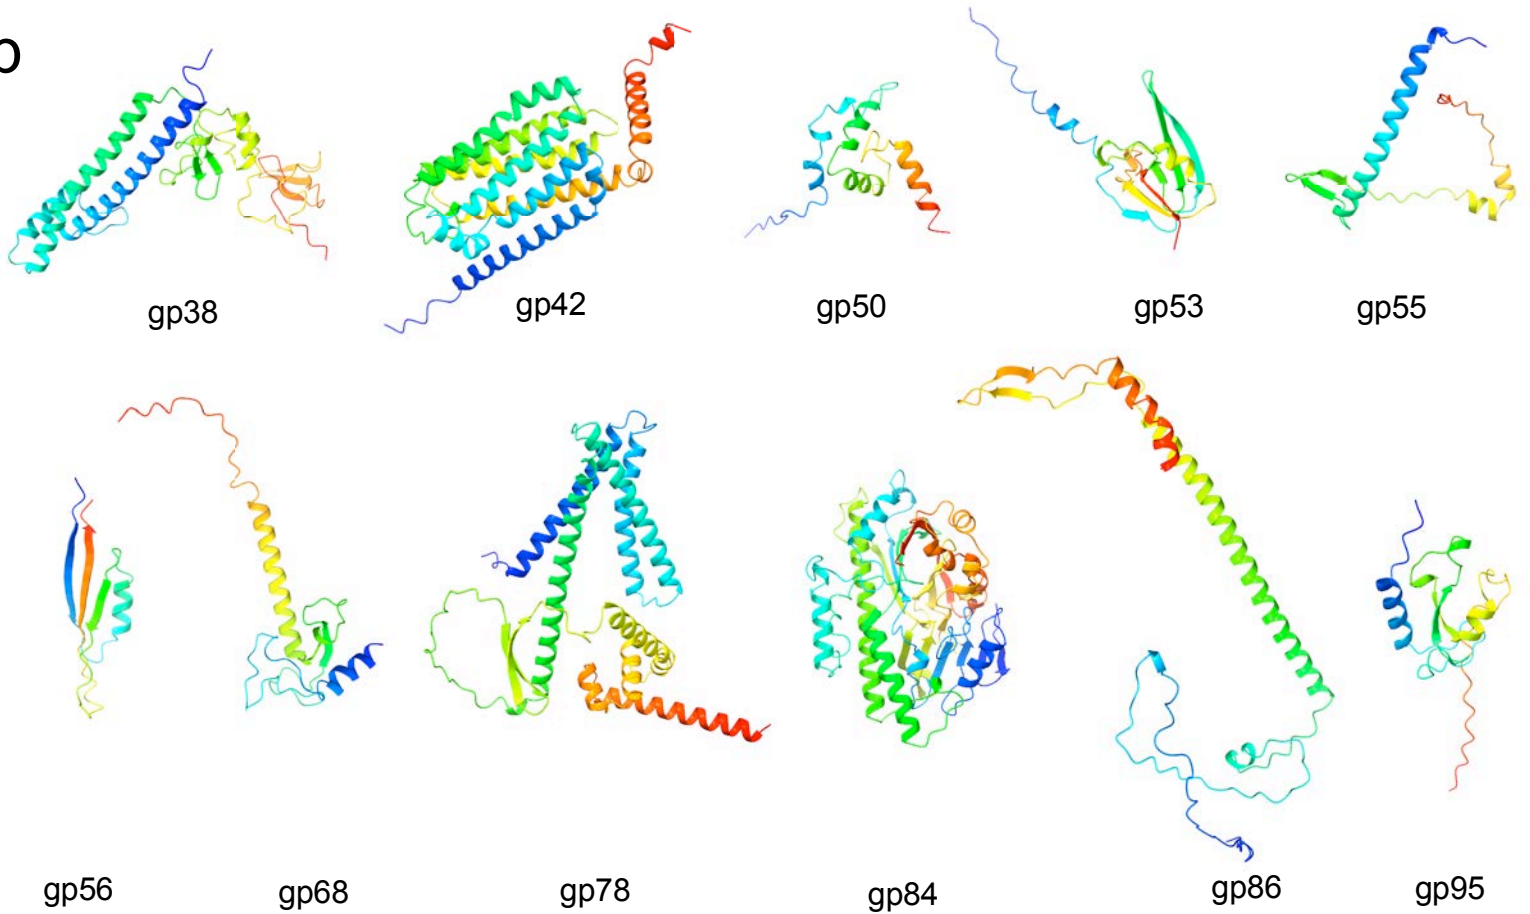

Figure S2





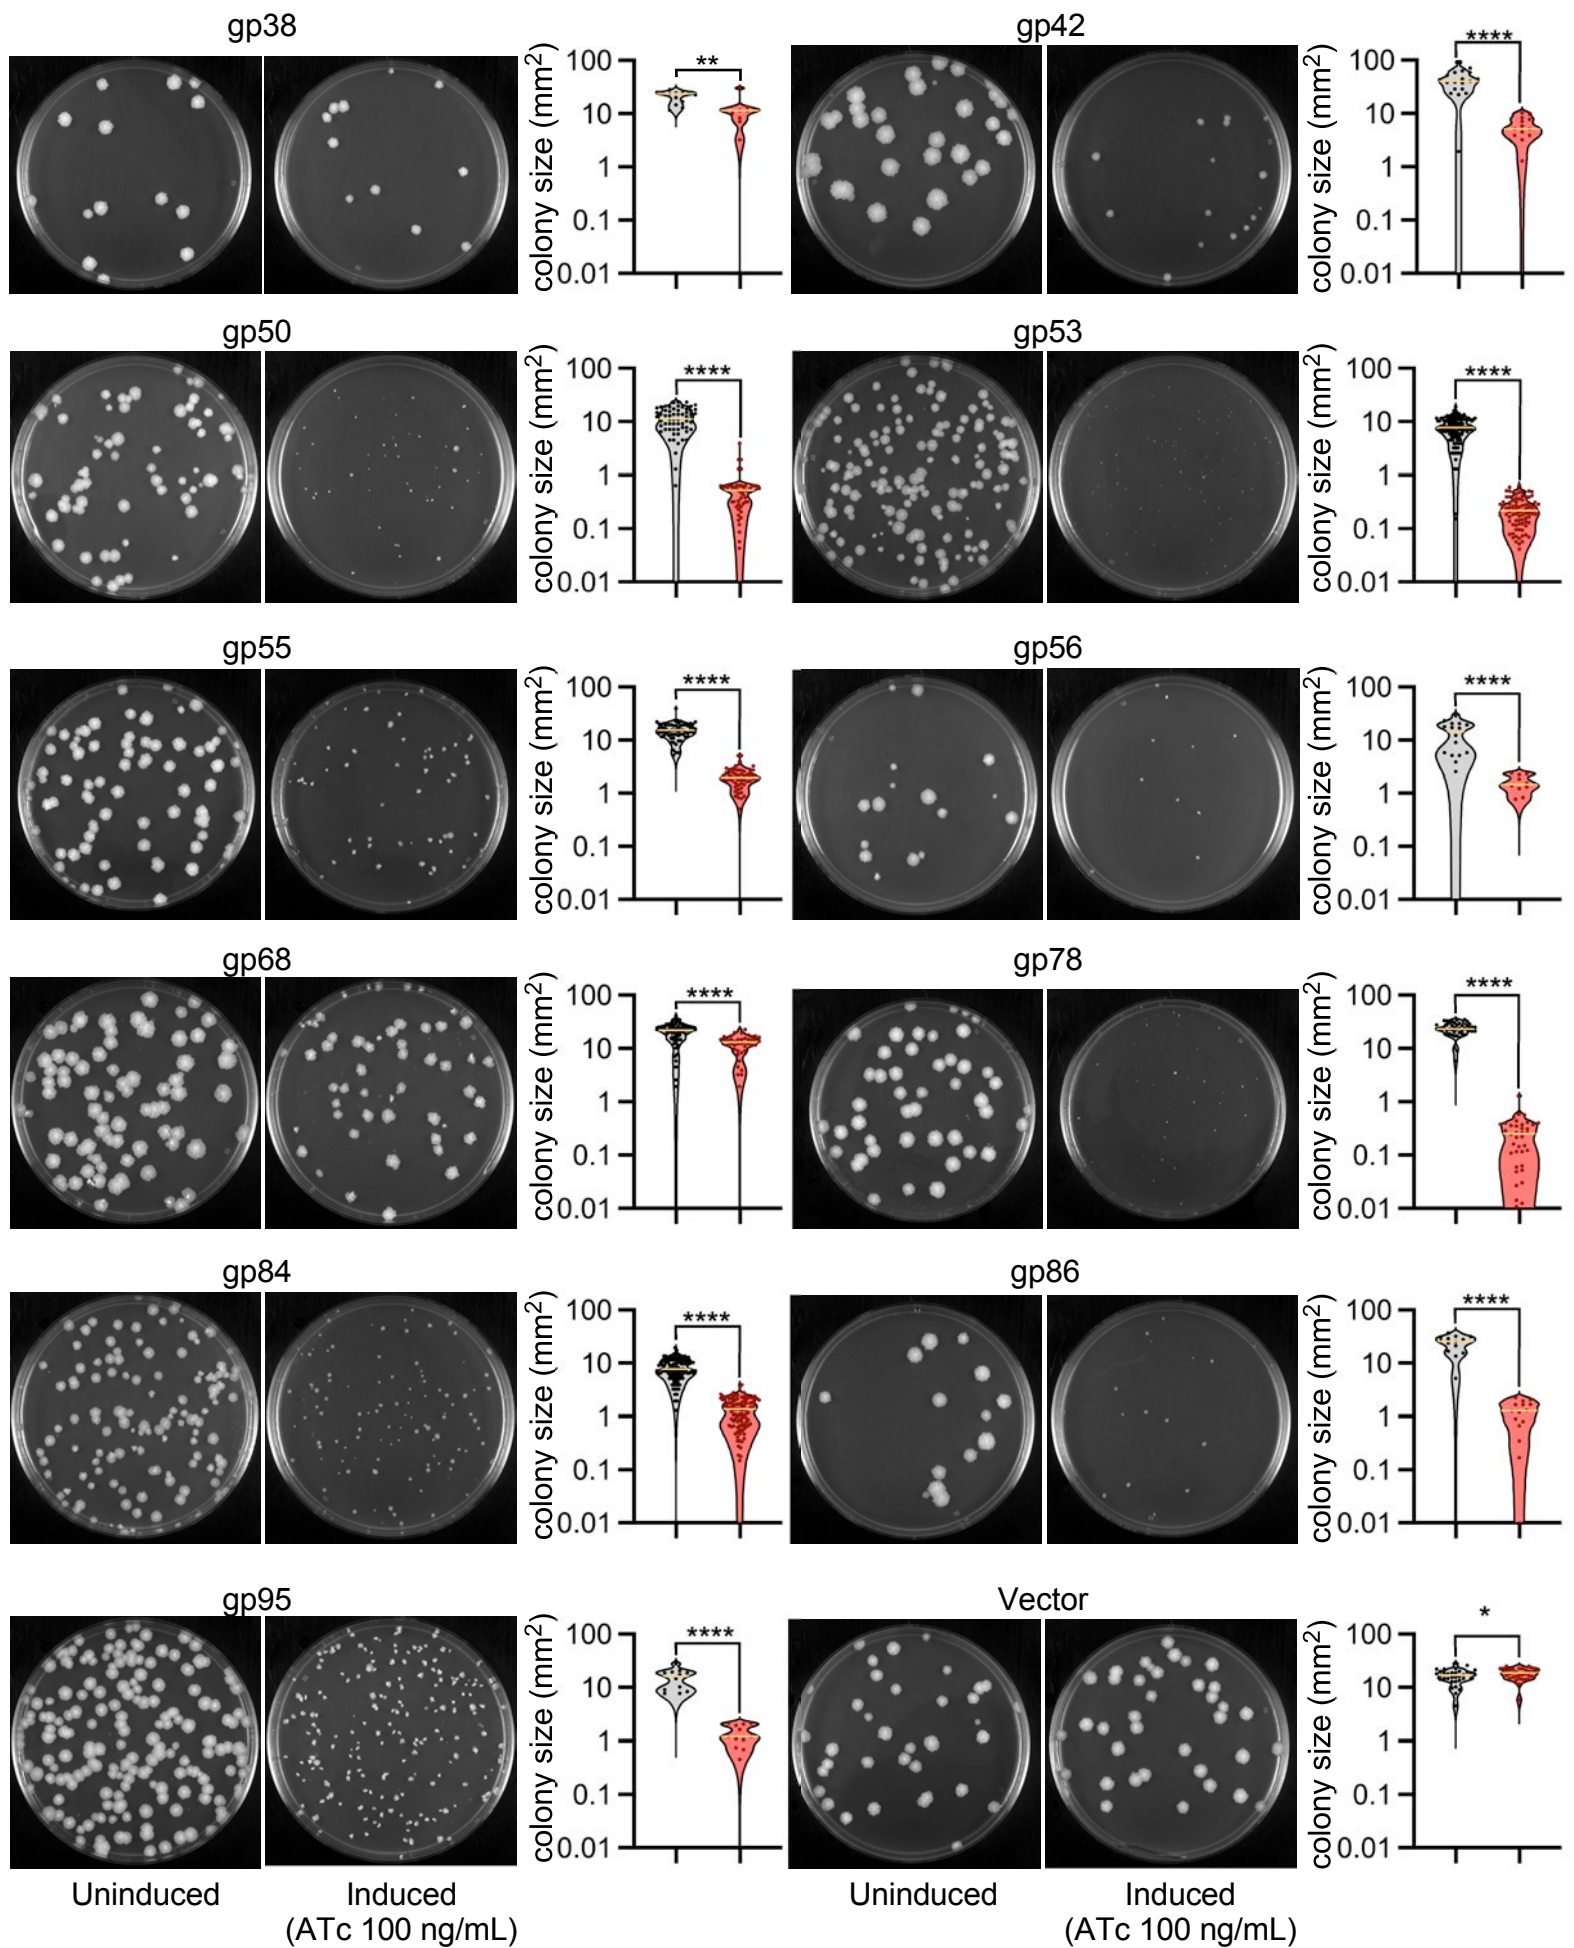

Figure S4

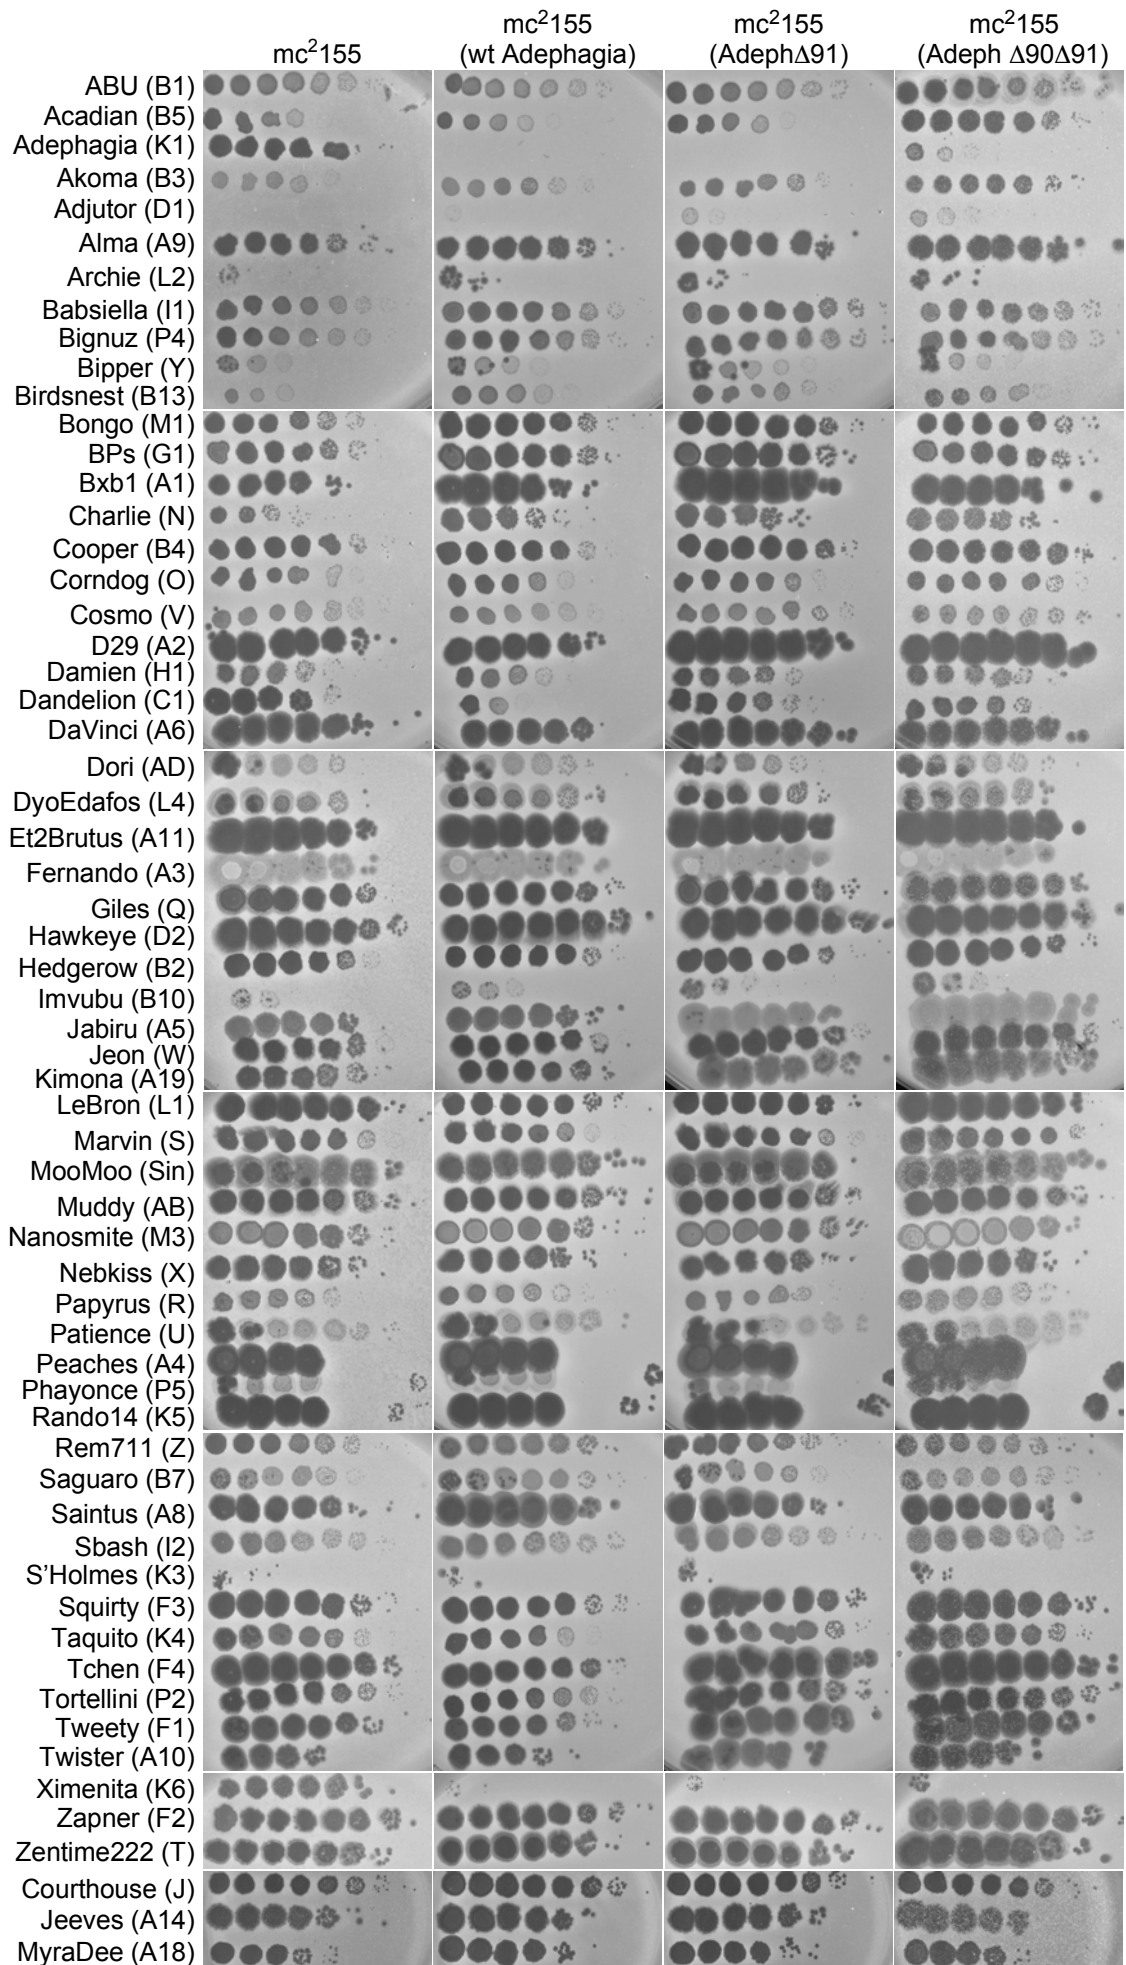

Figure S5
